# Supplementary material for: Insight into the interface chemical stability of the solid electrolyte Li1/2La1/2TiO3 and the Li/Li–In alloy anode
Source: Royal Society of Chemistry journal article supplement (doi:10.1039/d4nj02046d), 2024-01-01
Supplement: d4nj02046d1.pdf [file d4nj02046d1.pdf]

**Table 1** Li<sup>+</sup> diffusion barriers based on the different diffusion paths in LLTO|Li interface.

| Li1-Li2/Å | Li <sup>+</sup> diffusion barrier/eV | Li2-Li3/Å | Li <sup>+</sup> diffusion barrier/eV |
|-----------|--------------------------------------|-----------|--------------------------------------|
| 0         | 0                                    | 0         | 0                                    |
| 1.57989   | 0.11198                              | 0.69589   | 0.15424                              |
| 2.97921   | 0.56293                              | 2.487     | 0.60757                              |
| 4.28792   | 1.08265                              | 4.17352   | 1.17782                              |
| 5.59101   | 1.23404                              | 5.7656    | 1.25969                              |
| 6.6945    | -0.09245                             | 7.48079   | -0.1                                 |

**Table 2** Li<sup>+</sup> diffusion barriers based on the different diffusion paths in LLTO|LiIn<sub>2</sub> interface.

| Li1-Li2/Å | Li <sup>+</sup> diffusion barrier/eV | Li2-Li3/Å | Li <sup>+</sup> diffusion barrier/eV | Li3-Li4/Å | Li <sup>+</sup> diffusion barrier/eV |
|-----------|--------------------------------------|-----------|--------------------------------------|-----------|--------------------------------------|
| 0         | 0                                    | 0         | 0                                    | 0         | 0                                    |
| 1.02957   | 0.97477                              | 0.71892   | 1.21451                              | 0.90389   | 0.88539                              |
| 2.00572   | 0.08921                              | 1.38081   | 0.16204                              | 1.8079    | 0.05249                              |
| 2.9317    | 0.08069                              | 2.1101    | 0.05019                              | 2.67348   | 0.11214                              |
| 3.82689   | 0.87719                              | 2.73717   | 0.63227                              | 3.70845   | 1.03035                              |
